# Supplementary material for: Antimicrobial and biological effects of polyaniline/polyvinylpyrrolidone nanocomposites loaded with silver nanospheres/triangles
Source: Royal Society of Chemistry journal article supplement (doi:10.1039/d1nj02729h), 2021-01-01
Supplement: d1nj02729h1.pdf [file d1nj02729h1.pdf]

## Supplementary material

### Antimicrobial and biological effects of polyaniline/polyvinylpyrrolidone nanocomposites loaded silver nanospheres/triangles

Una Stamenović<sup>a\*</sup>, Sladjana Davidović<sup>b</sup>, Sandra Petrović<sup>a</sup>, Andreja Leskovic<sup>a</sup>, Milovan Stoiljković<sup>a</sup>, Vesna Vodnik<sup>a</sup>

<sup>a</sup>*Vinča Institute of Nuclear Sciences - National Institute of the Republic of Serbia, University of Belgrade, 11001 Belgrade, Serbia*

<sup>b</sup>*Faculty of Technology and Metallurgy, University of Belgrade, Karnegijeva 4, 11000 Belgrade, Serbia*

#### Corresponding author

\*E-mail: [una@vin.bg.ac.rs](mailto:una@vin.bg.ac.rs), Tel: +381113408750, Fax: +381113408607

#### 1 FTIR analysis of Ag-PANI/PVP nanocomposites

Fourier Transformed Infrared (FTIR) spectra of the nanocomposites were recorded in ATR mode by Thermo Nicolet 380 FTIR Spectrophotometer.

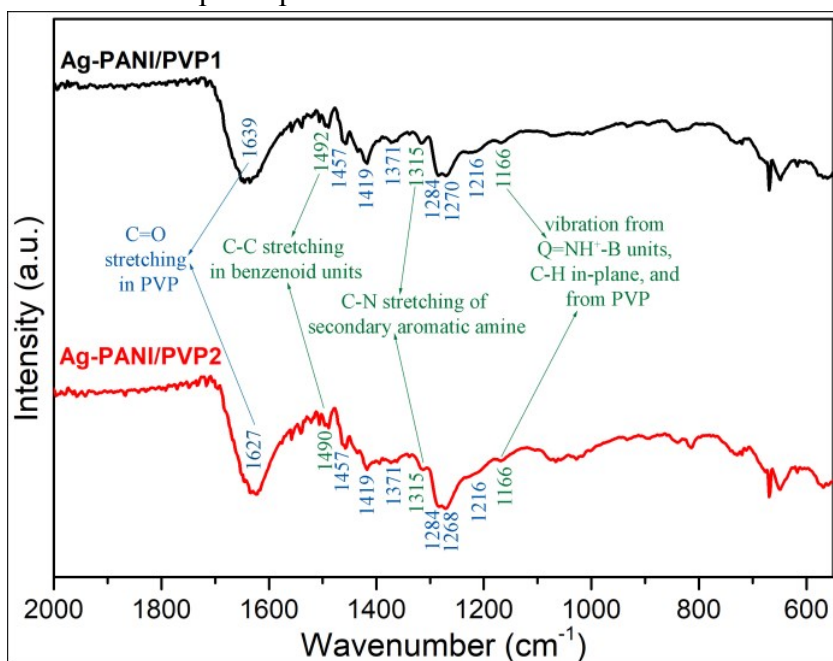

Fig. S1 FTIR spectra of Ag-PANI/PVP1 and Ag-PANI/PVP2 nanocomposites

**Table S1** Wavenumbers and assignments of some characteristic vibrations present in FTIR spectra of both nanocomposites<sup>1-8</sup>

| Ag-PANI/PVP1 (cm <sup>-1</sup> ) | Ag-PANI/PVP2 (cm <sup>-1</sup> ) | Assignment                                                                                                     |
|----------------------------------|----------------------------------|----------------------------------------------------------------------------------------------------------------|
| 1639                             | 1627                             | C=O stretching in PVP                                                                                          |
| 1492                             | 1490                             | PANI- vibration from C–C stretching in B units                                                                 |
| 1457, 1419                       | 1457, 1419                       | Confirmation of the PVP molecules' existence in both Ag-PANI/PVP nanocomposites                                |
| 1371                             | 1371                             |                                                                                                                |
| 1284                             | 1284                             |                                                                                                                |
| 1268, 1216                       | 1270, 1216                       |                                                                                                                |
| 1315                             | 1315                             | PANI - vibration from C–N stretching of secondary aromatic amine                                               |
| 1166                             | 1166                             | PANI - vibration from Q=NH <sup>+</sup> –B units in PANI-ES and C–H in-plane deformation vibration, and/or PVP |

## 2 Antimicrobial activity of Ag-PANI/PVP nanocomposites

**Table S2** Antimicrobial activity of Ag-PANI/PVP nanocomposites and pure PANI for *E. coli* (Initial number of colonies =  $4.0 \times 10^6$  CFU/mL).

| Sample        | Concentration (ppm) | Number of microbial colonies 1 h after their contact with (CFU) | Microbial reduction (%) after 1 h | Number of microbial colonies 2 h after their contact with (CFU) | Microbial reduction (%) after 2 h | Number of microbial colonies 4 h after their contact with (CFU) | Microbial reduction (%) after 4 h |
|---------------|---------------------|-----------------------------------------------------------------|-----------------------------------|-----------------------------------------------------------------|-----------------------------------|-----------------------------------------------------------------|-----------------------------------|
| PANI          | 1                   | $3.8 \times 10^6$                                               | 5.0                               | $3.4 \times 10^6$                                               | 15.0                              | $9.8 \times 10^5$                                               | 75.5                              |
|               | 2                   | $3.3 \times 10^6$                                               | 17.5                              | $3.0 \times 10^6$                                               | 25.0                              | $9.2 \times 10^5$                                               | 77.0                              |
|               | 5                   | $2.4 \times 10^6$                                               | 40.0                              | $2.2 \times 10^6$                                               | 45.0                              | $8.4 \times 10^5$                                               | 79.0                              |
|               | 10                  | $2.1 \times 10^6$                                               | 47.5                              | $1.5 \times 10^6$                                               | 62.5                              | $7.0 \times 10^5$                                               | 82.5                              |
|               | 20                  | $1.5 \times 10^6$                                               | 62.5                              | $1.1 \times 10^6$                                               | 72.5                              | $5.9 \times 10^5$                                               | 85.3                              |
| Ag-PANI/PVP 1 | 1                   | $1.1 \times 10^6$                                               | 72.5                              | $3.4 \times 10^5$                                               | 91.5                              | $2.4 \times 10^5$                                               | 94.0                              |
|               | 2                   | $1.1 \times 10^6$                                               | 72.5                              | $2.9 \times 10^5$                                               | 92.8                              | $2.0 \times 10^5$                                               | 95.0                              |
|               | 5                   | $1.0 \times 10^5$                                               | 97.5                              | $1.0 \times 10^5$                                               | 97.5                              | $6.6 \times 10^4$                                               | 98.4                              |
|               | 10                  | $9.3 \times 10^4$                                               | 97.7                              | $2.4 \times 10^3$                                               | 99.9                              | $8.0 \times 10^2$                                               | 99.9                              |
|               | 20                  | $7.2 \times 10^4$                                               | 98.2                              | $2.0 \times 10^3$                                               | 99.9                              | <10                                                             | 99.9                              |
| Ag-PANI/PVP 2 | 1                   | $3.1 \times 10^5$                                               | 92.3                              | $2.8 \times 10^5$                                               | 93.0                              | $1.4 \times 10^5$                                               | 96.5                              |
|               | 2                   | $1.6 \times 10^5$                                               | 96.0                              | $1.0 \times 10^5$                                               | 97.5                              | $4.7 \times 10^4$                                               | 98.8                              |
|               | 5                   | $7.2 \times 10^4$                                               | 98.2                              | $6.8 \times 10^4$                                               | 98.3                              | $5.7 \times 10^3$                                               | 99.9                              |
|               | 10                  | $5.2 \times 10^4$                                               | 98.7                              | $2.0 \times 10^3$                                               | 99.9                              | <10                                                             | 99.9                              |
|               | 20                  | $4.1 \times 10^4$                                               | 99.0                              | $1.2 \times 10^3$                                               | 99.9                              | <10                                                             | 99.9                              |

**Table S3** Antimicrobial activity of Ag-PANI/PVP nanocomposites and pure PANI for *S. aureus* (Initial number of colonies =  $5.7 \times 10^6$  CFU/mL).

| Sample        | Concentration (ppm) | Number of microbial colonies 1 h after their contact with (CFU) | Microbial reduction (%) after 1 h | Number of microbial colonies 2 h after their contact with (CFU) | Microbial reduction (%) after 2 h | Number of microbial colonies 4 h after their contact with (CFU) | Microbial reduction (%) after 4 h |
|---------------|---------------------|-----------------------------------------------------------------|-----------------------------------|-----------------------------------------------------------------|-----------------------------------|-----------------------------------------------------------------|-----------------------------------|
| PANI          | 1                   | $5.1 \times 10^6$                                               | 10.5                              | $4.7 \times 10^6$                                               | 17.5                              | $4.3 \times 10^6$                                               | 24.5                              |
|               | 2                   | $5.0 \times 10^6$                                               | 12.3                              | $4.6 \times 10^6$                                               | 19.3                              | $4.2 \times 10^6$                                               | 26.3                              |
|               | 5                   | $4.8 \times 10^6$                                               | 15.8                              | $4.0 \times 10^6$                                               | 29.8                              | $3.9 \times 10^6$                                               | 31.6                              |
|               | 10                  | $4.8 \times 10^6$                                               | 15.8                              | $3.8 \times 10^6$                                               | 33.3                              | $3.6 \times 10^6$                                               | 36.8                              |
|               | 20                  | $4.8 \times 10^6$                                               | 15.8                              | $2.9 \times 10^6$                                               | 49.1                              | $2.2 \times 10^6$                                               | 61.4                              |
| Ag-PANI/PVP 1 | 1                   | $2.6 \times 10^6$                                               | 54.4                              | $2.0 \times 10^6$                                               | 64.9                              | $1.2 \times 10^6$                                               | 78.9                              |
|               | 2                   | $2.5 \times 10^6$                                               | 56.1                              | $1.2 \times 10^6$                                               | 78.9                              | $1.0 \times 10^6$                                               | 82.5                              |
|               | 5                   | $2.2 \times 10^6$                                               | 61.4                              | $9.8 \times 10^5$                                               | 82.8                              | $9.2 \times 10^5$                                               | 83.9                              |
|               | 10                  | $2.1 \times 10^6$                                               | 63.2                              | $8.6 \times 10^5$                                               | 84.9                              | $1.2 \times 10^5$                                               | 97.9                              |
|               | 20                  | $2.0 \times 10^6$                                               | 64.9                              | $6.6 \times 10^5$                                               | 88.4                              | $7.2 \times 10^4$                                               | 98.7                              |
| Ag-PANI/PVP 2 | 1                   | $2.0 \times 10^6$                                               | 64.9                              | $1.8 \times 10^6$                                               | 68.4                              | $1.1 \times 10^6$                                               | 80.7                              |
|               | 2                   | $1.9 \times 10^6$                                               | 66.7                              | $6.1 \times 10^5$                                               | 89.3                              | $4.4 \times 10^5$                                               | 92.3                              |
|               | 5                   | $1.9 \times 10^6$                                               | 66.7                              | $3.5 \times 10^5$                                               | 93.8                              | $2.9 \times 10^5$                                               | 94.9                              |
|               | 10                  | $1.3 \times 10^6$                                               | 77.2                              | $2.7 \times 10^5$                                               | 95.2                              | $8.0 \times 10^4$                                               | 98.6                              |
|               | 20                  | $1.2 \times 10^6$                                               | 78.9                              | $1.1 \times 10^5$                                               | 98.0                              | $4.8 \times 10^4$                                               | 99.2                              |

**Table S4** Antimicrobial activity of Ag-PANI/PVP nanocomposites and pure PANI for *C. albicans* (Initial number of colonies =  $1.8 \times 10^6$  CFU/mL).

| Sample        | Concentration (ppm) | Number of microbial colonies 1 h after their contact with (CFU) | Microbial reduction (%) after 1 h | Number of microbial colonies 2 h after their contact with (CFU) | Microbial reduction (%) after 2 h | Number of microbial colonies 4 h after their contact with (CFU) | Microbial reduction (%) after 4 h |
|---------------|---------------------|-----------------------------------------------------------------|-----------------------------------|-----------------------------------------------------------------|-----------------------------------|-----------------------------------------------------------------|-----------------------------------|
| PANI          | 1                   | $1.8 \times 10^6$                                               | 1.7                               | $1.8 \times 10^6$                                               | 1.7                               | $1.5 \times 10^6$                                               | 16.7                              |
|               | 2                   | $1.7 \times 10^6$                                               | 5.5                               | $1.6 \times 10^6$                                               | 11.1                              | $1.3 \times 10^6$                                               | 27.7                              |
|               | 5                   | $1.7 \times 10^6$                                               | 5.5                               | $1.5 \times 10^6$                                               | 16.7                              | $1.3 \times 10^6$                                               | 27.7                              |
|               | 10                  | $1.6 \times 10^6$                                               | 11.1                              | $1.4 \times 10^6$                                               | 22.2                              | $1.2 \times 10^6$                                               | 33.3                              |
|               | 20                  | $1.5 \times 10^6$                                               | 16.7                              | $1.4 \times 10^6$                                               | 22.2                              | $1.2 \times 10^6$                                               | 33.3                              |
| Ag-PANI/PVP 1 | 1                   | $1.3 \times 10^6$                                               | 27.7                              | $1.0 \times 10^6$                                               | 44.4                              | $8.9 \times 10^5$                                               | 50.1                              |
|               | 2                   | $1.2 \times 10^6$                                               | 33.3                              | $1.0 \times 10^6$                                               | 44.4                              | $7.3 \times 10^5$                                               | 59.4                              |
|               | 5                   | $1.1 \times 10^6$                                               | 38.9                              | $9.5 \times 10^5$                                               | 47.2                              | $7.2 \times 10^5$                                               | 60.0                              |
|               | 10                  | $1.0 \times 10^6$                                               | 44.4                              | $8.7 \times 10^5$                                               | 51.6                              | $2.1 \times 10^5$                                               | 88.3                              |
|               | 20                  | $8.0 \times 10^5$                                               | 55.6                              | $5.8 \times 10^5$                                               | 67.8                              | $1.9 \times 10^5$                                               | 89.4                              |
| Ag-PANI/PVP 2 | 1                   | $1.2 \times 10^6$                                               | 33.3                              | $9.8 \times 10^5$                                               | 45.6                              | $6.5 \times 10^5$                                               | 63.9                              |
|               | 2                   | $1.1 \times 10^6$                                               | 38.9                              | $8.9 \times 10^5$                                               | 50.1                              | $6.1 \times 10^5$                                               | 66.1                              |
|               | 5                   | $1.0 \times 10^6$                                               | 44.4                              | $7.8 \times 10^5$                                               | 56.6                              | $5.2 \times 10^5$                                               | 71.1                              |
|               | 10                  | $8.8 \times 10^5$                                               | 51.2                              | $6.6 \times 10^5$                                               | 63.3                              | $1.9 \times 10^5$                                               | 89.4                              |
|               | 20                  | $7.3 \times 10^5$                                               | 59.4                              | $5.2 \times 10^5$                                               | 71.1                              | $1.6 \times 10^5$                                               | 91.1                              |

### 3 Silver ions release

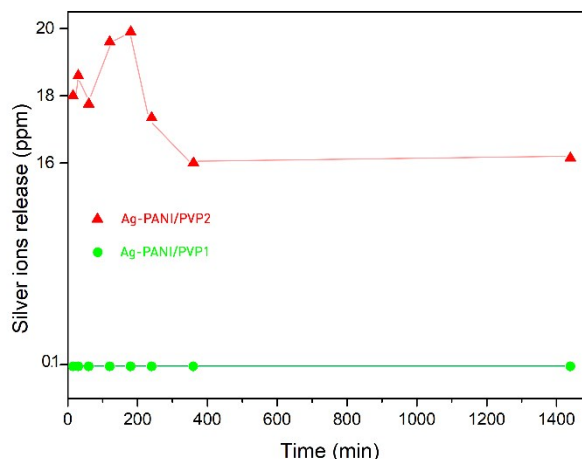

**Fig. S2** Silver ions release from Ag-PANI/PVP1 and Ag-PANI/PVP2 nanocomposites

### References

1. V. Kamble, G. Kodwani, R. Sridharkrishn, and B. Ankamwar, *Advances in Nano Research*, 2014, **2**, 111.
2. G. Ćirić-Marjanović, M. Trchová, and J. Stejskal, *Journal of Raman Spectroscopy*, 2008, **38**, 1375.
3. X. Qian, J. Yin, S. Feng, S. Liu, and Z. Zhu, *Journal of Materials Chemistry*, 2001, **11**, 2504.
4. [http://sdb.sdb.aist.go.jp/sdb/cgi-bin/direct\\_frame\\_top.cgi](http://sdb.sdb.aist.go.jp/sdb/cgi-bin/direct_frame_top.cgi)
5. S.U.D. Khan, B. Ahmed, S.K. Raghuvanshi, and M.A. Wahab, *Indian Journal of Pure and Applied Physics*, 2014, **52**, 192.
6. U. Bogdanović, V.V. Vodnik, S.P. Ahrenkiel, M. Stoiljković, G. Ćirić-Marjanović, and J.M. Nedeljković, *Synthetic Metals*, 2014, **195**, 122.
7. M.D. Bedre, S. Basavaraja, B.D. Salwe, V.L. Shivakumar, and A. Venkataraman, *Polymer Composites*, 2009, **30**, 1668.
8. J. Stejskal, *Chemical Papers*, 2013, **67**, 814.
